# Supplementary material for: Preparation of VxW1−xO2(M)@SiO2 ultrathin nanostructures with high optical performance and optimization for smart windows by etching
Source: Royal Society of Chemistry journal article supplement (doi:10.1039/c3ta12232h), 2013-01-01
Supplement: c3ta12232h.pdf [file c3ta12232h.pdf]

## SUPPLEMENTARY INFORMATION

# Preparation of $V_xW_{1-x}O_2(M)@SiO_2$ ultrathin nanostructures with high optical performance and the optimization for smart window by etching

Aibin Huang,<sup>a,b</sup> Yijie Zhou,<sup>a,b</sup> Shidong Ji,<sup>a</sup> Yamei Li,<sup>a,b</sup> Hongjie Luo<sup>a,d</sup> and Ping Jin<sup>\*a,c</sup>

<sup>a</sup> State Key Laboratory of High Performance Ceramics and Superfine Microstructure, Shanghai Institute of Ceramics, Chinese Academy of Sciences, Dingxi 1295, Changning, Shanghai, 200050, China, Tel/Fax: +86-21-6990-6208 Email: p-jin@mail.sic.ac.cn.

<sup>b</sup> Graduate School of Chinese Academy of Sciences, Beijing 100049, China

<sup>c</sup> Materials Research Institute for Sustainable Development, National Institute of Advanced Industrial Science and Technology (AIST), 2266-98 Shimoshidami, Moriyama-ku, Nagoya 463-8560, Japan

<sup>d</sup> School of Materials Science and Engineering, Shanghai University, Shangda Rd.99, Baoshan District, Shanghai 200444, China

### Supplementary Results:

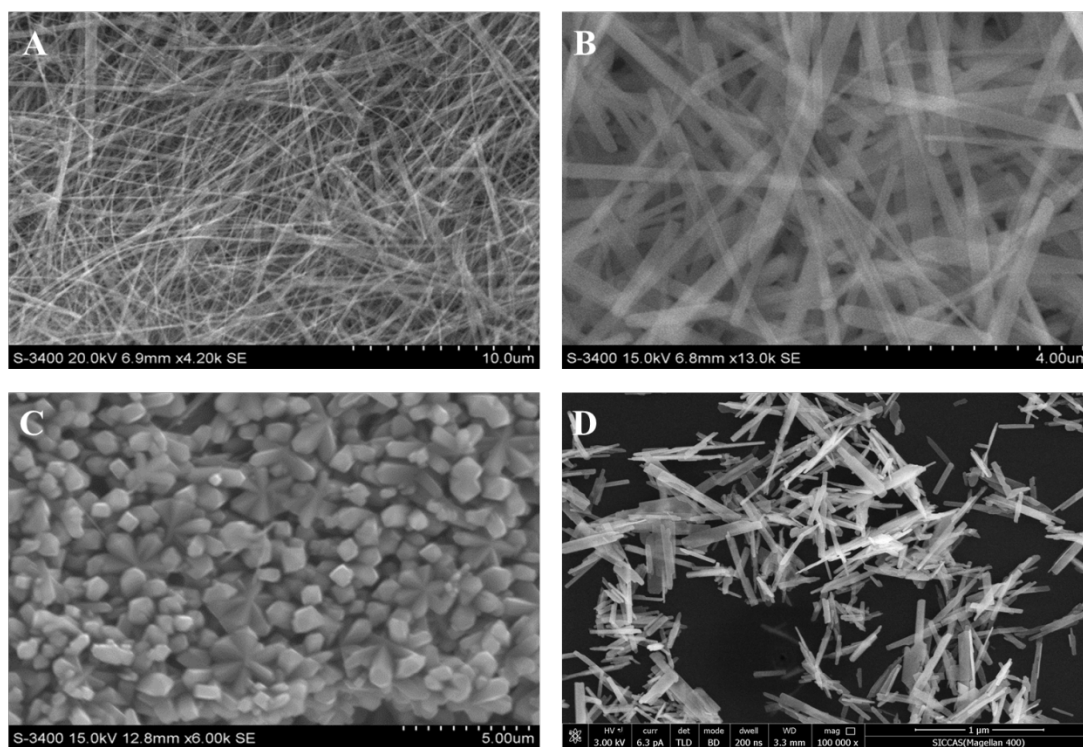

**Fig. S1.**  $\text{VO}_2(\text{B})$  nanowires (A), nanoribbons (B), nanorods (C) and nanostructures (D) synthesized by the same hydrothermal procedure with different dispersant.

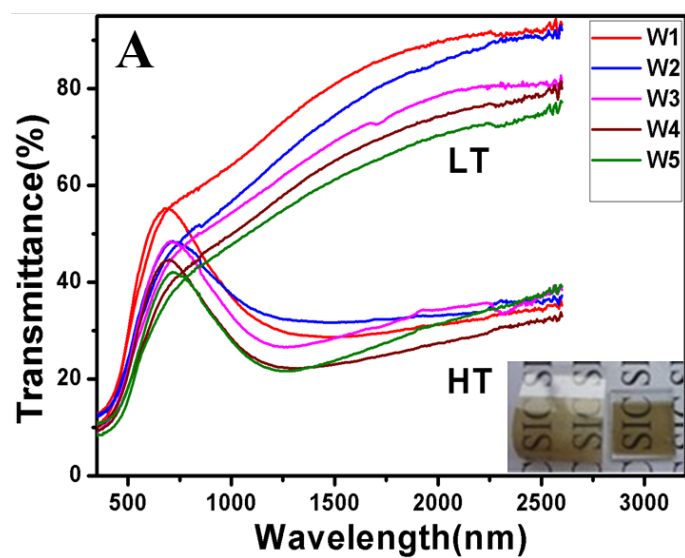

**Fig. S2.** Optical transmittance spectrum of  $V_{1-x}W_xO_2@SiO_2$  at high and low temperature (W1, W2, W3, W4 and W5 expressed the various doping amount of 0 at%, 0.5 at%, 1 at%, 1.5 at%, 2 at%). The inset was the film image.

**Table S1.** DSC peak positions of the sample with various W doping.

| Sample | Doping content (at%) | Endothermic peak (°C) | Exothermic peak (°C) |
|--------|----------------------|-----------------------|----------------------|
| W1     | 0                    | 68.5                  | 55.8                 |
| W2     | 0.5                  | 63.4                  | 50.9                 |
| W3     | 1                    | 50.5                  | 30.8                 |
| W4     | 1.5                  | 47.5                  | 27.2                 |
| W5     | 2                    | 29.2                  | 23.3                 |

**Table S2.** Optical properties of  $V_{1-x}W_xO_2(M)@SiO_2$  nanoparticles (W1', W2', W3', W4' and W5' corresponding to the W1, W2, W3, W4 and W5 without coating).

| Sample | $T_{sol-L}$ (%) | $T_{sol-H}$ (%) | $\Delta T_{sol}$ (%) | $T_{lum-L}$ (%) | $T_{lum-H}$ (%) | $\Delta T_{2000\text{ nm}}$ (%) |
|--------|-----------------|-----------------|----------------------|-----------------|-----------------|---------------------------------|
| W1     | 52.24           | 38.56           | 13.68                | 39.10           | 42.11           | 58.7                            |
| W2     | 45.69           | 35.26           | 10.43                | 33.62           | 35.57           | 52.4                            |
| W3     | 42.99           | 33.31           | 9.68                 | 29.46           | 32.65           | 44.3                            |
| W4     | 38.96           | 30.14           | 8.82                 | 27.32           | 29.30           | 46.9                            |
| W5     | 36.67           | 29.52           | 7.15                 | 24.69           | 25.74           | 38.9                            |
| W1'    | 41.25           | 33.44           | 7.81                 | 26.62           | 30.71           | 43.2                            |
| W2'    | 32.19           | 24.79           | 7.40                 | 23.96           | 28.90           | 50.2                            |
| W3'    | 31.31           | 25.14           | 6.17                 | 20.40           | 26.22           | 40.5                            |
| W4'    | 34.03           | 28.58           | 5.45                 | 20.54           | 28.76           | 42.6                            |
| W5'    | 27.33           | 22.72           | 4.60                 | 15.73           | 20.90           | 35.2                            |
